# Supplementary material for: Pollutant Exposures from Natural Gas Cooking Burners: A Simulation-Based Assessment for Southern California
Source: PubMed Central journal article supplement (PMC3888569; doi:10.1289/ehp.1306673), 2013-11-05
Supplement: ehp.1306673.s001.508.pdf [file ehp.1306673.s001.508.pdf]

**Supplemental Material**

**Pollutant Exposures from Natural Gas Cooking Burners: A Simulation-Based Assessment for Southern California**

Jennifer M. Logue, Neil E. Klepeis, Agnes B. Lobscheid, and Brett C. Singer

**Table of Contents**

Supplemental Material, Table S1. Properties of cooking duration distributions.....2

Supplemental Material, Table S2. Age-based time-location patterns based on NHAPS data (Klepeis et al. 2001).....2

Indoor Reactions of NO and Ozone to Produce NO<sub>2</sub>.....2

Supplemental Material, Table S3. Data shown in Figure 2 and Figure 3.....3

References.....4

**Supplemental Material, Table S1.** Properties of cooking duration distributions.

|           | Breakfast |      |     | Lunch |      |     | Dinner |      |     |
|-----------|-----------|------|-----|-------|------|-----|--------|------|-----|
|           | n         | GM   | GDS | n     | GM   | GDS | n      | GM   | GDS |
| Oven Use  | 25        | 15.1 | 1.8 | 16    | 14.4 | 1.7 | 138    | 37.7 | 1.7 |
| Range Use | 163       | 10.8 | 1.5 | 77    | 14.6 | 1.9 | 257    | 26.9 | 1.6 |

The geometric mean (GM) and geometric standard deviation (GSD) of the log-normal distributions from which each cooking event is assigned a duration, in minutes. Results are based on the work of Klug et al. (2011). Due to the limited data, the results were not subdivided into based on the occupancy characteristics of the home.

**Supplemental Material, Table S2.** Age-based time-location patterns based on NHAPS data (Klepeis et al. 2001).

|             | Weekday- work at home          | Weekday- other                                                             | Weekend pattern |
|-------------|--------------------------------|----------------------------------------------------------------------------|-----------------|
| 0-5 years   | Home all the time <sup>a</sup> | If there are senior(s) in home, same as 65+, if not, Away: 8:30 am-5:30 pm | Away: 2pm-4 pm  |
| 6-18 years  | n/a                            | Away: 8:30 am-3:00 pm                                                      | Away: 2pm-4 pm  |
| 19-64 years | Home all the time <sup>a</sup> | Away: 8:30 am- 5:30 pm <sup>a</sup>                                        | Away: 2pm-4 pm  |
| 65+ years   | n/a                            | Away: 10-11am                                                              | Away: 10-11am   |

<sup>a</sup>The RASS specifies whether or not a home occupant works at home. If the RASS says an occupant stays home, we assumed one of the 19-64 years olds in the home, as well as any young children (0-5 years) followed the Weekday-stay at home patter. Otherwise, everyone in the home follows the Weekday -other pattern.

**Indoor Reactions of NO and Ozone to Produce NO<sub>2</sub>**

The model did not include homogeneous or heterogeneous chemical reactions, such as the reaction of NO and ozone to produce NO<sub>2</sub>. NO emission rates from NGCBs (Singer et al. 2009) are large and available ozone would be the limiting factor in the reaction. To estimate the upper-bound impact of these reactions, we assumed all incoming ozone would react with available NO. Geyh et al (2000) measured ozone concentrations ranging from 5-160 ppb with a mean value of 55 ppb outside of 116 SoCal homes during summer and winter months. Using the average cohort air exchange rate (Summer: 1.2 h<sup>-1</sup> Winter: 0.44 h<sup>-1</sup>) and average home size to calculate the effective rate at which ozone would enter the homes, ozone would raise the effective NO<sub>2</sub> emission rate for cooking by 2-72% in summer and by 0-10% in winter depending on location and time of day. This underscores that our estimates for NO<sub>2</sub> concentrations in summer are conservative and that the health impact of NGCB is likely even larger than modeled here.

**Supplemental Material, Table S3.** Data shown in Figure 2 and Figure 3.

|                                             | NO2(ppb) (k=1.05 1/h) <sup>a</sup> |    |     |    |     |    |     |    |     |    | NO2(ppb) (k=0.5 1/h) <sup>a</sup> |     |     |     |     | CO (ppm) |    |     |    |     |    |     |    |      |    | HCHO (ppb) |    |     |    |     |    |     |    |     |    |
|---------------------------------------------|------------------------------------|----|-----|----|-----|----|-----|----|-----|----|-----------------------------------|-----|-----|-----|-----|----------|----|-----|----|-----|----|-----|----|------|----|------------|----|-----|----|-----|----|-----|----|-----|----|
|                                             | P5                                 | ±% | P25 | ±% | P50 | ±% | P75 | ±% | P95 | ±% | P5                                | P25 | P50 | P75 | P95 | P5       | ±% | P25 | ±% | P50 | ±% | P75 | ±% | P95  | ±% | P5         | ±% | P25 | ±% | P50 | ±% | P75 | ±% | P95 | ±% |
| <b>Week Avg. (Fig. 2)</b>                   |                                    |    |     |    |     |    |     |    |     |    |                                   |     |     |     |     |          |    |     |    |     |    |     |    |      |    |            |    |     |    |     |    |     |    |     |    |
| Winter                                      |                                    |    |     |    |     |    |     |    |     |    |                                   |     |     |     |     |          |    |     |    |     |    |     |    |      |    |            |    |     |    |     |    |     |    |     |    |
| Concen. outdoors                            | 13                                 | -- | 19  | -- | 24  | -- | 24  | -- | 28  | -- | 13                                | 19  | 24  | 24  | 28  | 0.5      | -- | 0.6 | -- | 0.7 | -- | 0.7 | -- | 2.9  | -- | --         | -- | --  | -- | --  | -- | --  | -- | --  | -- |
| Indoor concn. due to outdoors <sup>b</sup>  | 3                                  | 5  | 4   | 2  | 6   | 2  | 8   | 3  | 10  | 3  | 5                                 | 7   | 10  | 12  | 15  | 0.5      | 1  | 0.7 | 1  | 0.7 | 0  | 0.8 | 1  | 2.8  | 0  | --         | -- | --  | -- | --  | -- | --  | -- | --  | -- |
| Total indoor concn. <sup>b</sup>            | 5                                  | 3  | 8   | 2  | 10  | 3  | 13  | 3  | 21  | 5  | 9                                 | 12  | 16  | 21  | 34  | 0.5      | 2  | 0.8 | 1  | 0.9 | 3  | 1.5 | 5  | 3.4  | 4  | 0          | 13 | 0   | 9  | 1   | 7  | 3   | 8  | 13  | 10 |
| Exposure concn.: No range hood <sup>b</sup> | 4                                  | 4  | 7   | 3  | 9   | 4  | 12  | 4  | 22  | 4  | 7                                 | 11  | 14  | 19  | 33  | 0.4      | 4  | 0.6 | 2  | 0.8 | 3  | 1.4 | 7  | 3.0  | 9  | 0          | 17 | 0   | 14 | 1   | 8  | 3   | 9  | 13  | 14 |
| Summer                                      |                                    |    |     |    |     |    |     |    |     |    |                                   |     |     |     |     |          |    |     |    |     |    |     |    |      |    |            |    |     |    |     |    |     |    |     |    |
| Concen. outdoors                            | 6                                  | -- | 8   | -- | 13  | -- | 16  | -- | 16  | -- | 6                                 | 8   | 13  | 16  | 16  | 0.1      | -- | 0.1 | -- | 0.1 | -- | 0.2 | -- | 1.2  | -- | --         | -- | --  | -- | --  | -- | --  | -- | --  | -- |
| Indoor concn. due to outdoors               | 2                                  | -- | 4   | -- | 6   | -- | 8   | -- | 11  | -- | 3                                 | 5   | 8   | 11  | 13  | 0.1      | -- | 0.1 | -- | 0.1 | -- | 0.2 | -- | 1.2  | -- | --         | -- | --  | -- | --  | -- | --  | -- | --  | -- |
| Total indoor concn.                         | 4                                  | -- | 6   | -- | 9   | -- | 12  | -- | 17  | -- | 6                                 | 9   | 12  | 16  | 24  | 0.1      | -- | 0.2 | -- | 0.3 | -- | 0.5 | -- | 1.4  | -- | 0          | -- | 0   | -- | 0   | -- | 1   | -- | 6   | -- |
| Exposure concn.: No range hood              | 3                                  | -- | 6   | -- | 8   | -- | 10  | -- | 16  | -- | 5                                 | 8   | 11  | 14  | 23  | 0.1      | -- | 0.1 | -- | 0.2 | -- | 0.4 | -- | 1.3  | -- | 0          | -- | 0   | -- | 1   | -- | 1   | -- | 6   | -- |
| <b>Peak 1-hr (Fig. 3)</b>                   |                                    |    |     |    |     |    |     |    |     |    |                                   |     |     |     |     |          |    |     |    |     |    |     |    |      |    |            |    |     |    |     |    |     |    |     |    |
| Winter                                      |                                    |    |     |    |     |    |     |    |     |    |                                   |     |     |     |     |          |    |     |    |     |    |     |    |      |    |            |    |     |    |     |    |     |    |     |    |
| Indoor concn. due to outdoors <sup>b</sup>  | 3                                  | 5  | 5   | 3  | 7   | 3  | 10  | 3  | 14  | 3  | 4                                 | 8   | 11  | 15  | 20  | 0.3      | 4  | 0.5 | 1  | 0.7 | 3  | 0.9 | 2  | 2.6  | 4  | --         | -- | --  | -- | --  | -- | --  | -- | --  | -- |
| Total indoor concn. <sup>b</sup>            | 36                                 | 4  | 70  | 4  | 110 | 3  | 177 | 6  | 364 | 8  | 46                                | 90  | 147 | 229 | 488 | 1.0      | 6  | 1.9 | 7  | 4.2 | 8  | 7.9 | 10 | 24.2 | 18 | 2          | 11 | 8   | 8  | 19  | 7  | 43  | 8  | 158 | 15 |
| Exposure concn.: No range hood <sup>b</sup> | 38                                 | 6  | 77  | 5  | 127 | 3  | 214 | 4  | 477 | 5  | 49                                | 95  | 162 | 279 | 644 | 1.0      | 7  | 2.0 | 9  | 4.5 | 4  | 9.0 | 10 | 28.1 | 18 | 2          | 12 | 9   | 13 | 21  | 8  | 49  | 9  | 186 | 15 |
| Exposure concn.: Range hood on              | 21                                 | -- | 39  | -- | 63  | -- | 103 | -- | 218 | -- | 16                                | 49  | 77  | 129 | 288 | 1.0      | -- | 1.4 | -- | 2.7 | -- | 4.9 | -- | 14.7 | -- | 1          | -- | 4   | -- | 10  | -- | 45  | -- | 95  | -- |
| Summer                                      |                                    |    |     |    |     |    |     |    |     |    |                                   |     |     |     |     |          |    |     |    |     |    |     |    |      |    |            |    |     |    |     |    |     |    |     |    |
| Indoor concn. due to outdoors               | 2                                  | -- | 3   | -- | 5   | -- | 7   | -- | 11  | -- | 2                                 | 5   | 7   | 9   | 13  | 0.0      | -- | 0.1 | -- | 0.1 | -- | 0.2 | -- | 1.4  | -- | --         | -- | --  | -- | --  | -- | --  | -- | --  | -- |
| Total indoor concn.                         | 27                                 | -- | 53  | -- | 85  | -- | 139 | -- | 288 | -- | 33                                | 63  | 102 | 172 | 356 | 0.3      | -- | 1.0 | -- | 2.4 | -- | 4.9 | -- | 18.1 | -- | 1          | -- | 6   | -- | 13  | -- | 30  | -- | 111 | -- |
| Exposure concn.: No range hood              | 30                                 | -- | 60  | -- | 97  | -- | 164 | -- | 369 | -- | 35                                | 67  | 113 | 209 | 470 | 0.3      | -- | 1.1 | -- | 2.7 | -- | 5.8 | -- | 21.4 | -- | 1          | -- | 6   | -- | 15  | -- | 36  | -- | 142 | -- |
| Exposure concn.: Range hood on              | 15                                 | -- | 28  | -- | 46  | -- | 78  | -- | 170 | -- | 20                                | 36  | 58  | 101 | 32  | 0.2      | -- | 0.5 | -- | 1.3 | -- | 2.6 | -- | 8.6  | -- | 1          | -- | 2   | -- | 6   | -- | 15  | -- | 57  | -- |

<sup>a</sup>Data are shown for NO2 modeled concentrations for both modeled first order loss rates (k=1.05 h<sup>-1</sup> and k=0.5 h<sup>-1</sup>)

<sup>b</sup>Summary statistics for Scenario 1 (winter week, only for k=1.05 h<sup>-1</sup> for NO2) are presented as a mean ± range to indicate the variation across the fifteen replicate runs that resulted from reassigning parameter values. Figures 1 and 2 showed the mean values of these runs.

## References

- Geyh AS, Xue JP, Ozkaynak H, Spengler JD. 2000. The Harvard Southern California chronic ozone exposure study: Assessing ozone exposure of grade-school-age children in two Southern California communities. *Environmental Health Perspectives* 108:265-270.
- Klepeis NE, Nelson WC, Ott WR, Robinson JP, Tsang AM, Switzer P, et al. 2001. The National Human Activity Pattern Survey (NHAPS): A resource for assessing exposure to environmental pollutants. *Journal of Exposure Analysis and Environmental Epidemiology* 11:231-252.
- Klug VL, Lobscheid AB, Singer BC. 2011. Cooking appliance use in California homes – data collected from a web-based survey. LBNL-5028E. Berkeley, CA:Lawrence Berkeley National Laboratory.
- Singer BC, Apte MG, Black DR, Hotchi T, Lucas D, Lunden MM, et al. 2010. Natural gas variability in California: Environmental impacts and device performance - experimental evaluation of pollutant emissions from residential appliances. CEC-500-2009-099-APE. Sacramento, CA: California Energy Commission.
